# Supplementary material for: SRPK1 and Akt Protein Kinases Phosphorylate the RS Domain of Lamin B Receptor with Distinct Specificity: A Combined Biochemical and In Silico Approach
Source: PubMed Central journal article supplement (PMC4841541; doi:10.1371/journal.pone.0154198), 2016-04-22
Supplement: pone.0154198.s005.pdf [file pone.0154198.s005.pdf]

| Simulated System | RMSD (Å)                               |                       |                       |                        |                       |
|------------------|----------------------------------------|-----------------------|-----------------------|------------------------|-----------------------|
|                  | (Snapshot time /Total simulation time) |                       |                       |                        |                       |
| MD Run           | Akt2/GSK3-pept                         | Akt2/LBR-S78          | Akt2/LBR-S80          | Akt2/LBR-S82           | Akt2/LBR-S84          |
| MD1              | 1.33<br>(18.02 /20 ns)                 | 1.55<br>(45.56 /50ns) | 1.64<br>(42.47 /50ns) | 1.84<br>(46.81 /50 ns) | 1.56<br>(47.10 /50ns) |
| MD2              | 1.43<br>(15.68 ns)                     | 1.48<br>(46.22 ns)    | 1.55<br>(45.46 ns)    | 1.47<br>(44.14 ns)     | 1.37<br>(41.62 ns)    |
| MD3              | 1.17<br>(17.97 ns)                     | 1.56<br>(46.16 ns)    | 1.64<br>(45.94 ns)    | 1.70<br>(43.01 ns)     | 1.89<br>(46.92 ns)    |
| MD4              | 1.37<br>(16.67 ns)                     | 1.57<br>(43.51 ns)    | 1.49<br>(48.67 ns)    | 1.71<br>(43.90 ns)     | 1.72<br>(45.83 ns)    |
| MD5              |                                        | 1.66<br>(43.73 ns)    | 1.67<br>(41.71 ns)    | 1.66<br>(46.38 ns)     | 1.36<br>(46.06 ns)    |
| MD6              |                                        |                       | 1.39<br>(42.74 ns)    | 1.54<br>(42.08 ns)     | 1.50<br>(45.14 ns)    |
