# Supplementary material for: SRPK1 and Akt Protein Kinases Phosphorylate the RS Domain of Lamin B Receptor with Distinct Specificity: A Combined Biochemical and In Silico Approach
Source: PubMed Central journal article supplement (PMC4841541; doi:10.1371/journal.pone.0154198), 2016-04-22
Supplement: pone.0154198.s006.pdf [file pone.0154198.s006.pdf]

|                            | RMSD (Å)                               |                          |                          |                          |                          |
|----------------------------|----------------------------------------|--------------------------|--------------------------|--------------------------|--------------------------|
|                            | (Snapshot time /Total simulation time) |                          |                          |                          |                          |
| Simulated System<br>MD Run | Akt2/GSK3-pept<br>· ATP/MG             | Akt2/LBR-S78<br>· ATP/MG | Akt2/LBR-S80<br>· ATP/MG | Akt2/LBR-S82<br>· ATP/MG | Akt2/LBR-S84<br>· ATP/MG |
| MD1                        | 1.35<br>(42.53 /50ns)                  | 1.28<br>(43.86 /50ns)    | 1.27<br>(42.49 /50ns)    | 1.29<br>(43.66 /50ns)    | 1.89<br>(45.70 /50ns)    |
| MD2                        | 1.25<br>(46.78 ns)                     | 1.53<br>(45.39 ns)       | 1.67<br>(47.43 ns)       | 1.69<br>(46.01 ns)       | 1.77<br>(45.09 ns)       |
| MD3                        | 1.61<br>(47.72 ns)                     | 1.37<br>(49.43 ns)       | 1.33<br>(41.99 ns)       | 1.37<br>(47.42 ns)       | 1.44<br>(48.46 ns)       |
| MD4                        |                                        |                          |                          |                          | 1.51<br>(45.76 ns)       |
